# Supplementary material for: Distribution of an antioxidant in polypropylene/ethylene–octene copolymer blends studied by atomic force microscopy-infrared
Source: Royal Society of Chemistry journal article supplement (doi:10.1039/d2sm00765g), 2022-01-01
Supplement: d2sm00765g1.pdf [file d2sm00765g1.pdf]

## Supplementary Information

# Distribution of Antioxidant in Polypropylene/Ethylene–Octene Copolymer Blends Studied by Atomic Force Microscopy–Infrared

Zhenxing Zhong<sup>a,b</sup>, Li Peng<sup>a</sup>, Juanxia Su<sup>a</sup>, Zhongfu Luo<sup>a</sup>, Charles C. Han<sup>a</sup>, Xianbo Huang<sup>a\*</sup>,

Zhaohui Su<sup>b\*</sup>

<sup>a</sup>National-certified Enterprise Technology Center, Kingfa Science and Technology Co., LTD.,

Guangzhou 510663, P. R. China

<sup>b</sup>State Key Laboratory of Polymer Physics and Chemistry, Changchun Institute of Applied

Chemistry, Chinese Academy of Sciences, Changchun 130022, P. R. China

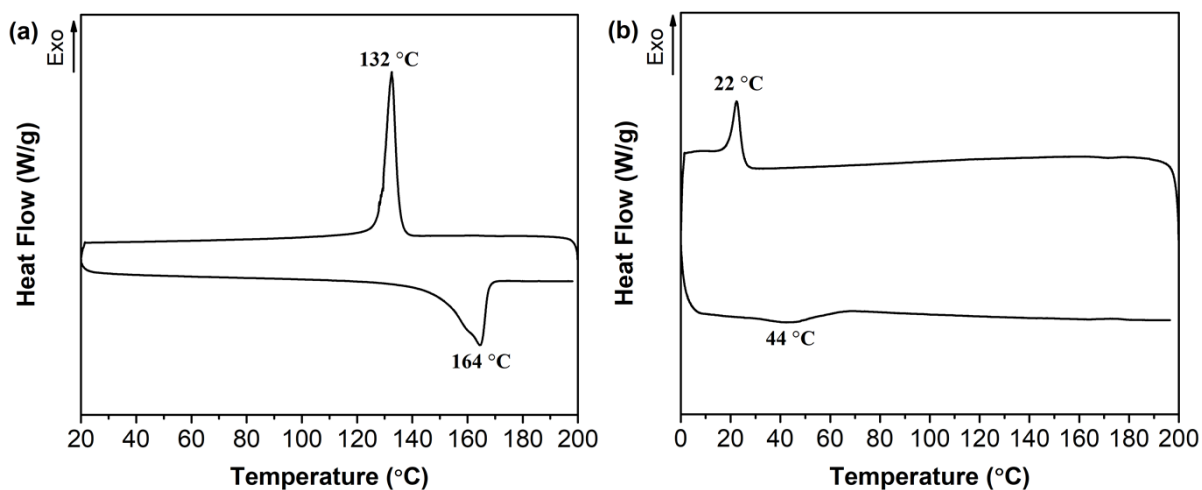

Figure S1. DSC heating and cooling traces of (a) iPP and (b) POE (ramping rate 10 K/min, nitrogen atmosphere).

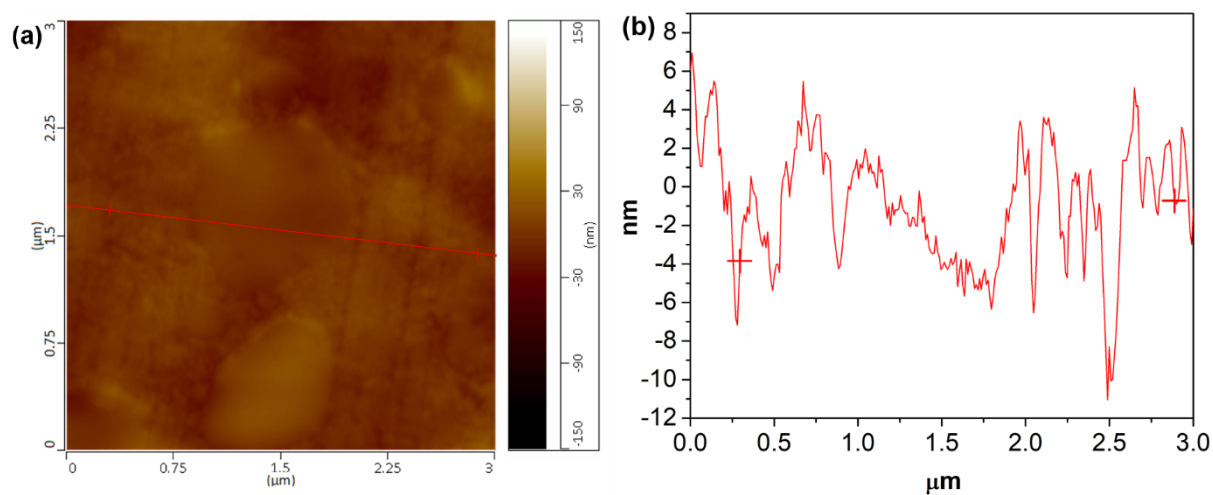

Figure S2. (a) AFM height image of iPP/POE blend prepared by extrusion at screw speed of 300 rpm and (b) height fluctuation along the line in (a).
